# Supplementary material
Source: Research Square preprint supplement (doi:10.21203/rs.3.rs-5497789/v1)
Supplement: Supplementary file 1 [file 91008326542bd07e52c783e2.xlsx]

## Sheet: README
Supplementary material for "Co-producing climate change adaptation indicators with small Norwegian municipalities"
Henke, L., E. Sandberg, K. Knoth, I.R. Davøen, K. Groven, E. Sivertsen
The following sheets are included in this document:
	Set O is the original indicator set.
	Full evolution shows the different iterations the indicator set went through during the CPK process.
	Set V is the final indicator set.

## Sheet: Set O
Set O
	ID	Grouping	Indicator	Unit	Type	Data source	Description
Process part 1	P1	Phase 1 - Get an overview	To what extent is climate change adaptation part of the:			State planning guidelines for climate adaptation, see guidance https://www.miljodirektoratet.no/myndigheter/klimaarbeid/klimatilpasning/veiledning-til-statlige-planretningslinjer-for-klimatilpasning/	Assessment of whether climate adaptation is mentioned in overarching documents and indicates the status and to what extent the climate adaptation work is an integral part of the municipality's planning work. The municipalities can add other management documents, such as relevant municipal sub-plans, action programs and strategy documents
			a) The municipalities plan strategy?	Small - medium - large	Process	Own assessment	The municipal planning strategy is not a plan, but a tool for the new municipal council to clarify which planning tasks are to be prioritized during the election period in order to steer development in the desired direction.
			b) The municipal plan - community section?	Small - medium - large	Process	Own assessment	The municipality's community section takes a position on long-term challenges, and sets goals and strategies for the municipality and is the basis for the sectors' plans and activities.
			c) The municipal plan - area section?	Small - medium - large	Process	Own assessment	The municipality must have a area plan for the entire municipality that shows the connection between future social development and land use. Area plans can be drawn up for parts of the municipality's area.
	P2	Phase 1 - Get an overview	The municpal overall ROS-analyse:			Climate adaptation in sectors: Social security and preparedness https://www.miljodirektoratet.no/myndigheter/klimaarbeid/klimatilpasning/klimatilpasning-i-sektorer/samfunnssikkerhet-og-beredskap/	Assessment of future climate, in relation to ROS analyses, vulnerability analysis and emergency plans. See definition of climate-related events
			a) To what extent are climate-related incidents part of the municipality's overall ROS?	Small - medium - large	Process	Own assessment
			b) Is future climate taken into consideration in the municipality's overall ROS?	Small - medium - large	Process	Own assessment
	P3	Phase 1 - Get an overview	Has the municipality developed provisions on and/or guidelines for climate adaptation for use in work with regulatory plans?	Y/N	Process	Own assessment	Assessment of status and focus in relation to regulatory plans. Can also be internal guidelines, supervisors, etc.
	P4	Phase 1 - Get an overview	Has the municipality made a vulnerability analysis for climate change up to 2090?	Y/N	Process	Own assessment	Assessment of status and focus in relation to vulnerability
	P5	Phase 2 - Develop goals and strategies	Have overall goals and strategies been drawn up for the climate adaptation work?	Y/N	Process	Own assessment	E.g. Prepared municipal sub-plan energy and climate
			If yes; which planning documents?
	P6	Phase 3 - Measures and action plans	Have action plans been drawn up to achieve the goals of climate adaptation?	Y/N	Process	Own assessment	E.g. Prepared municipal sub-plan energy and climate
	P7	Phase 4 - Reporting	Has the municipality created routines for following up the work on climate adaptation?	Y/N	Process	Own assessment	E.g. reporting tools, establishment of routines, mandate or job instructions
	P8	Phase 5 - Evaluation	Has the municipality created routines for regular evaluation of the climate adaptation work, for example when revising the plan for climate and energy and climate adaptation?	Y/N	Process	Own assessment
	P9	Phase 5 - Evaluation	Is there regular evaluation of the climate adaptation work, for example when revising the plan for climate and energy and climate adaptation?	Never - now and then - frequently	Process	Own assessment	This can be both internal or external evaluation
Process part 2	P10	Planning work	What proportion of the zoning plans adopted last year have provisions and/or guidelines on climate adaptation?	%	Process	Own assessment	Add up the number of plans climate adaptation is mentioned and divide by the total number of plans. Updated annually (counted annually, registered continuously).
	P11	Planning work	Based on the climate vulnerability analysis, what proportion of the climate adaptation challenges have measures been prepared for?	%	Process	Own assessment	Use identified vulnerabilities / climate risks from comprehensive ROS or similar. Can be limited to "red" and "yellow" risks. Updated annually (counted annually, registered continuously).
	P12	Planning work	What proportion of master plans, theme plans and sector plans in the municipality have mentioned climate adaptation in relation to the number of plans that should deal with climate adaptation?	%	Process	Own assessment	Registered when the various plans are on consultation. Updated annually (counted annually, registered continuously).
	P13	Economy	What proportion of decided investment projects (for example cost > x million NOK decided in the municipal council) ila. has the year made visible and assessed the consequences of future climate change?	%	Process	Own assessment	Updated annually, but registered continuously.
	P14	Economy	What proportion of the climate adaptation measures above x kroner has a cost/benefit assessment been prepared for?	%	Process	Own assessment	The municipality should choose a representative size for the cost for which they themselves believe a cost-benefit analysis should have been carried out, for example cost > NOK 1 million, and then check how many have actually had such an analysis carried out. Registered continuously, and counted annually.
	P15	Form of work	What proportion/number of man-years is set aside for coordinating climate adaptation work?	%	Process	Own assessment	Here, only positions that have described "coordination of climate adaptation" in the job description should be included in the calculation.
	P16	Form of work	Has the municipality established an interdisciplinary/sectoral group, if any, routines for interdisciplinary cooperation for climate adaptation?	%	Process	Own assessment
	P17	Form of work	To what extent does the municipality use an internal interdisciplinary/sectoral group to discuss climate adaptation?	Small - medium - large	Process	Own assessment	Can also be considered as the number of meetings during a year, if such a group is defined and has regular meetings.
Measure	T1	Form of work	Proportion of revised regulatory plans that have included climate adaptation measures in relation to the total number of revised regulatory plans	%	Measure	Own assessment
	T2	Form of work	Proportion of climate adaptation measures carried out in accordance with plan	%	Measure	Own assessment	Measures can be split up to apply to one or more risks/challenges
	T3	Building	Proportion of maintenance plans for buildings where climate adaptation is mentioned	%	Measure	Own assessment
	T4	Building	Proportion of health and care buildings where security measures have been taken against the risk of damage as a result of
			a) stormwater	%	Measure	Own assessment	https://www.nve.no/flaum-og-skred/kartlegging/faresonekart-kommuner/
			b) river flood	%	Measure	Own assessment	https://www.nve.no/flaum-og-skred/kartlegging/faresonekart-kommuner/
			c) landslide	%	Measure	Own assessment	https://www.nve.no/flaum-og-skred/kartlegging/faresonekart-kommuner/
			d) quick clay	%	Measure	Own assessment	https://www.nve.no/flaum-og-skred/kartlegging/faresonekart-kommuner/
			e) sea level rise	%	Measure	Own assessment	https://www.kartverket.no/til-sjos/se-havniva/kart
	T5	Building	Proportion of residents who live in areas where security measures have been taken against the risk of damage as a result of
			a) stormwater	%	Measure	Own assessment	https://www.nve.no/flaum-og-skred/kartlegging/faresonekart-kommuner/
			b) river flood	%	Measure	Own assessment	https://www.nve.no/flaum-og-skred/kartlegging/faresonekart-kommuner/
			c) landslide	%	Measure	Own assessment	https://www.nve.no/flaum-og-skred/kartlegging/faresonekart-kommuner/
			d) quick clay	%	Measure	Own assessment	https://www.nve.no/flaum-og-skred/kartlegging/faresonekart-kommuner/
			e) sea level rise	%	Measure	Own assessment	https://www.kartverket.no/til-sjos/se-havniva/kart
	T6	Building	Proportion of square meters of buildings in areas where security measures have been implemented against the risk of damage as a result of
			a) stormwater	%	Measure	Own assessment	https://www.nve.no/flaum-og-skred/kartlegging/faresonekart-kommuner/
			b) river flood	%	Measure	Own assessment	https://www.nve.no/flaum-og-skred/kartlegging/faresonekart-kommuner/
			c) landslide	%	Measure	Own assessment	https://www.nve.no/flaum-og-skred/kartlegging/faresonekart-kommuner/
			d) quick clay	%	Measure	Own assessment	https://www.nve.no/flaum-og-skred/kartlegging/faresonekart-kommuner/
			e) sea level rise	%	Measure	Own assessment	https://www.kartverket.no/til-sjos/se-havniva/kart
	T7	Road	Proportion of weights in areas where security measures have been implemented against the risk of damage as a result of
			a) stormwater	%	Measure	Own assessment	https://www.nve.no/flaum-og-skred/kartlegging/faresonekart-kommuner/
			b) river flood	%	Measure	Own assessment	https://www.nve.no/flaum-og-skred/kartlegging/faresonekart-kommuner/
			c) landslide	%	Measure	Own assessment	https://www.nve.no/flaum-og-skred/kartlegging/faresonekart-kommuner/
			d) quick clay	%	Measure	Own assessment	https://www.nve.no/flaum-og-skred/kartlegging/faresonekart-kommuner/
			e) sea level rise	%	Measure	Own assessment	https://www.kartverket.no/til-sjos/se-havniva/kart
	T8	Road	Share of bridges that have been upgraded to cope with e.g. 200-year floods with climate impact	%	Measure	Own assessment	Road authority handbooks N100 and N200
	T9	Road	Proportion of gutters that are dimensioned with a climate surcharge	%	Measure	Own assessment	Road authority handbooks N100 and N200
	T10	Stormwater	Proportion of stormwater measures that are solved using measures within local stormwater management instead of traditional pipe-based solutions	%	Measure	Own assessment
	T11	Stormwater	Share of the municipality's drinking water sources for which emergency plans have been drawn up, considering changes in vulnerability and quality as a result of climate change	%	Measure	Own assessment
Result	R1	Preparedness	Number of household hours per year in the municipality without electricity as a result of climate-related natural events	%	Result	NVE interruption statistics
	R2	Preparedness	Number of household hours per year in the municipality without water as a result of a climate-related natural event	%	Result	KOSTRA	Reported as unplanned downtime
	R3	Preparedness	Number of household hours per year in the municipality that are without a supply road as a result of a climate-related natural event	%	Result	NVDB	NVDB (Nasjonal vegdatabank - Statens Vegvesen)
	R4	Preparedness	Number of alerts (flood, landslide, storm, storm surge)	number	Result	Kunnskapsbanken
	R5	Preparedness	Number of efforts from fire and rescue services in climate-related natural events	number	Result	Kunnskapsbanken	The efforts and missions of the fire and rescue service
	R6	Economy	Annual payments/number of cases through the natural damage insurance scheme (Norwegian natural damage pool - NASK) (homes, holiday homes and commercial buildings)	number	Result	NASK / Kunnskapsbanken
	R7	Economy	Annual payments/number of cases through the natural damage compensation scheme (Directorate of Agriculture) (private infrastructure)	number	Result	Landbruks-direktoratet
	R8	Economy	Annual payments/number of cases through discretionary grants triggered by climate-related natural events	number	Result	Own assessment	The municipality can choose to add a relevant and available support scheme, see definition of support scheme
	R9	Economy	Annual payments/number of cases through extraordinary discretionary grants triggered by climate-related natural events	number	Result	Own assessment	The municipality can choose to add a relevant and available support scheme, see definition of support scheme
	R10	Economy	Number of new recourse claims against the municipality (in natural damage cases)	number	Result	Own assessment	Overview at the municipal administration/finance department
	R11	Building	Proportion of buildings for health and care services located in risk areas for
			a) stormwater	%	Result	Maps	https://www.nve.no/flaum-og-skred/kartlegging/faresonekart-kommuner/
			b) river flood	%	Result	Maps	https://www.nve.no/flaum-og-skred/kartlegging/faresonekart-kommuner/
			c) landslide	%	Result	Maps	https://www.nve.no/flaum-og-skred/kartlegging/faresonekart-kommuner/
			d) quick clay	%	Result	Maps	https://www.nve.no/flaum-og-skred/kartlegging/faresonekart-kommuner/
			e) sea level rise	%	Result	Maps	https://www.kartverket.no/til-sjos/se-havniva/kart
	R12	Building	Proportion of inhabitants living in risk areas for
			a) stormwater	%	Result	Maps	https://www.nve.no/flaum-og-skred/kartlegging/faresonekart-kommuner/
			b) river flood	%	Result	Maps	https://www.nve.no/flaum-og-skred/kartlegging/faresonekart-kommuner/
			c) landslide	%	Result	Maps	https://www.nve.no/flaum-og-skred/kartlegging/faresonekart-kommuner/
			d) quick clay	%	Result	Maps	https://www.nve.no/flaum-og-skred/kartlegging/faresonekart-kommuner/
			e) sea level rise	%	Result	Maps	https://www.kartverket.no/til-sjos/se-havniva/kart
	R13	Building	Proportion of square meters of buildings located in risk areas for
			a) stormwater	%	Result	Maps	https://www.nve.no/flaum-og-skred/kartlegging/faresonekart-kommuner/
			b) river flood	%	Result	Maps	https://www.nve.no/flaum-og-skred/kartlegging/faresonekart-kommuner/
			c) landslide	%	Result	Maps	https://www.nve.no/flaum-og-skred/kartlegging/faresonekart-kommuner/
			d) quick clay	%	Result	Maps	https://www.nve.no/flaum-og-skred/kartlegging/faresonekart-kommuner/
			e) sea level rise	%	Result	Maps	https://www.kartverket.no/til-sjos/se-havniva/kart
	R14	Road	Proportion of roads that are in risk areas for
			a) stormwater	%	Result	Maps	https://www.nve.no/flaum-og-skred/kartlegging/faresonekart-kommuner/
			b) river flood	%	Result	Maps	https://www.nve.no/flaum-og-skred/kartlegging/faresonekart-kommuner/
			c) landslide	%	Result	Maps	https://www.nve.no/flaum-og-skred/kartlegging/faresonekart-kommuner/
			d) quick clay	%	Result	Maps	https://www.nve.no/flaum-og-skred/kartlegging/faresonekart-kommuner/
			e) sea level rise	%	Result	Maps	https://www.kartverket.no/til-sjos/se-havniva/kart
	R15	Road	Proportion of roads that have to close in the event of 200-year floods with climate surcharge	%	Result	Own assessment	Use local climate surcharge obtained from e.g. www.klimaservicesenteret.no
	R16	Stormwater	Share of municipal combined sewage pipes (Length of combined sewer pipelines for both sewage and stormwater (km) / Total length of sewage pipeline (km))	%	Result	KOSTRA	Combination of two sizes that are already reported to KOSTRA. Combined network = network that conducts both storm water and waste water
	R17	Stormwater	Number of rainwater overflows per km of combined network (Number of rainwater overflows (number) / Length of combined pipe (km))	number/km	Result	KOSTRA	Combination of two sizes that are already reported to KOSTRA. Combined network = network that conducts both stormwater and waste water, rainwater overflow = discharge from a combined network to the surroundings consisting of rainwater and waste water
	R18	Stormwater	Proportion of residents connected to municipal water works with satisfactory test results in relation to color numbers	%	Result	KOSTRA	Climate change will in many cases lead to a gradual increase in the color number in drinking water sources (surface water), which can give treatment plants challenges in supplying drinking water with color numbers in accordance with the drinking water regulations
	R19	Stormwater	Proportion of stream and river length in exposed areas / urban areas that is open	%	Result	Own assessment	Subject to own analysis. Focus on areas that have challenges.
	R20	Stormwater	Proportion of stream and river length in exposed areas that have edge vegetation	%	Result	Own assessment	Must be seen in conjunction with R19 and make manual assessments of edge vegetation for the same stream stretches. Here, it is desirable to distinguish between sections that have vegetation and sections that have stone fills or other hard, artificial edges.
	R21	Stormwater	Proportion of building cases that use the blue-green factor measured against the total number of building cases	%	Result	Own assessment	Only relevant for municipalities that have introduced the blue-green factor. The blue-green factor is calculated according to the method given by Norwegian Standard, NS 3845. An alternative could be to calculate an average blue-green factor for the municipality.
	R22	Stormwater	Extraneous water in the drainage network	%	Result	bedreVANN	Extraneous water supplied to the treatment plants is in bedreVANN defined as follows: Extraneous water = Surface water + Infiltration of groundwater and drinking water

## Sheet: Full evolution
		Evolution of indicator set V
			Workshop 1 (Relevance of indicators)									Trondheim evaluation							Revision by researchers										Workshop 2 (Scoring on quality criteria)							Revision by researchers		Workshop 3 (calculating indicator values)	Revision by researchers	Final Set V
			Comments	Researchers' quality assessment								Quality assessment					Comments		Indicators (used in WS2)		Quality assessment							Comments	Quality assessment						Comments	Indicators (used in WS3)		Comments	Comments
Grouping	ID	Set O	Comments from practitioners	Interpretable	Reliable	Sensitive	Data availability	Efficient	Generalisability	Relevance	Comments researchers	Reliable	Data availability	Efficient	Generalisability	Relevance	Comments from Trondheim	Comments researchers	ID	Set V1	Interpretable	Reliable	Sensitive	Data availability	Efficient	Generalisability	Relevance	Comments from researchers	Interpretable	Reliable	Sensitive	Data availability	Efficient	Relevance	Comments from practitioners	ID	Set V2	Comments from practitioners	Comments from researchers	Grouping	ID	Set V3
Process 1	P1	To what extent is climate change adaptation part of the:									Krever manuell dokumentgjennomgang, og er skjønnsavhengig. På sikt kan man endre rutiner for rapportering, og gjøre datainnhenting mer effektivt	3	-	3	3	5	The indicator can give a good indication of the extent to which climate adaptation has been implemented the overall planning strategy, as well as KPA (legally binding) and KPS, and thus an indication of the bottom line in the municipality's climate adaptation work. Putting a value to the indicator is currently moderately time-consuming, as the document review must be done manually. Assessments ar…	We have chosen to keep this indicator, but with a slightly different wording and remove the "plan strategy"																		P1	To what extent is climate change adaptation integrated in the:	Needs clearer criteria; subjective assessment may vary.		Process 1	P1	To what extent is climate change adaptation integrated in the:
		a) The municipalities plan strategy?			3		5	3	3	5																											a) The municipalities plan strategy?					a) The municipalities plan strategy?
		b) The municipal plan - community section?			3		5	3	3	5																											b) The municipal plan - community section?					b) The municipal plan - community section?
		c) The municipal plan - area section?			3		5	3	3	5
																			P3	How many of the focus areas of NOU 2010:10 ‘Adapting to a changing climate’ does the ROS analysis consider?	5	3	5	5	5			Foreslå sjekkliste for miljømål i rapporten. EU Taxonomy, SDGs	5	5	5				It was noted that it is mandatory to include all these areas in the ROS to get it approved. A suggestion was made to have indicators that address red or yellow findings of the ROS. It was also mentioned that it is important to have a baseline to compare to. This indicator is difficult to compare between municipalities. The level of competence is also expected to vary between large, medium and sma…
																				a) natural environment									3.75	3.75	4	3.33333	3	4.33333
																				b) human health and safety									4.25	4	4.5	3.5	3.25	4.5
																				c) infrastructure and buildings									4	3.5	3.75	3.25	3.5	4.5
																				d) business and industry									3.25	3.25	3.5	3.25	3	4.5
																				e) society									4	3.75	3.75	3.75	3.5	4.5
Process 1	P2	The municpal overall ROS-analyse:			5		5	5	5	5		5	5	5	5	5	The indicator can provide insight into how well the effects of climate change is included in the ROS analysis, and where there is potential for improvement. Makes it easier to uncover deficiencies in the consideration of climate change and the impact on the risk of various unwanted climate-related events.Seem as a relevant evaluation indicator for the climate adaptation work as of today, and as a…	We have chosen to keep this indicator, but with a specification. P2 What proportion of the risks in the municipality's climate profile covered in comprehensive ROS? Further to include a new P3 for when the ROS was last updated and P4 Assesses overall ROS expected climate on a) short term, b) medium term, and c) long term. In the guidance for P2, it is mentioned that the climate vulnerability anal…	P2	Has an overall ROS analysis (according to the Planning and Building Act) been prepared for the municipality as a whole?	3	5	5	5	5		5	Veldig lik P5 (konkretiskert hvilket dok). Vurdert egnet. Kyrre: Viktig at CCA-mål er nedfelt i kom.planen (samf.del og/eller arealdel), gitt at indikatoren omfattar både KPS og KPA meiner eg key indicator = 5.	4.5	4.25	4.25	4.75	4.75	4.5	It is more interesting to focus on how old the ROS is, as the standard turnover time of 10 years is very long and the choice to update is a political one.	P2	What proportion of the risks in the municipality's climate profile are covered in the overall ROS?	The guidance should link to the climate profiles and mention that these profiles apply at the county level.	Based on TRD discussion, more concrete link btw expected climate risks and ROS. If no klimasårbarhetsanalyse has been done, can base on regional klimaprofil	Process 1	P2	What proportion of the risks in the municipality's climate profile are covered in the overall ROS?
		a) To what extent are climate-related incidents part of the municipality's overall ROS?																																		P3	When was the overall ROS last updated?		comment about how often is good, also linking to latest TEK updates for example	Process 1	P3	When was the overall ROS last updated?
		b) Is future climate taken into consideration in the municipality's overall ROS?																	P4	To what extent are climate-related incidents part of the municipality's overall ROS?								P2 bør deles i to. Prosessindikator, nivå 1: Har kommunen en overordnet ROS?							This is expected to depend to a large extent on the age of the ROS. It is also a subjective assessment, making it difficult to compare results between municipalities.
																						5		5	5	5	5		3.5	4	4	3.5	3.25	4.75
																																				P4	Does the overall ROS consider expected climate change for:			Process 1	P4	Does the overall ROS consider expected climate change for:
																																					a) 2030					a) short term (0-10 years)
																																					b) 2050					b) medium term (10-30 years)
																																					c) 2100					c) Long term (>30 years)
																																					d) Beyond 2100					d) How long term?
Process 1	P3	Has the municipality developed provisions on and/or guidelines for climate adaptation for use in work with zoning plans?			3		5	3	5	5	Krever manuell gjennomgang av kommuneplanens arealdel	3	5	3	5	5	Can be a relevant indicator for initiating the process of preparing a template for inclusion of climate adaptation in zoning plans, and in the preparation of explicit climate adaptation regulations which as of today does not exist in the municipality. In order to quantify the next indicators (What proportion of the zoning plans adopted last year have regulations and/or guidelines about climate ad…	We have retained an indicator of BGF. We will probably further develop this indicator when this has become one requirements and registration have improved in the municipality. A checklist when preparing planning documents should also be made.
Process 1	P4	Has the municipality made a vulnerability analysis for climate change up to 2090?		5	5	5	5	5	5	5	Kan deles i to: Har laget klimasårbarhetsanalyse - Har langsiktig klimasårbarhetsanalyse. Lang sikt bør inngå i all							See comment for P3	P5	Has the municipality made a vulnerability analysis for climate change up to 2090?	5	5	5	5	5	5	5	Lang sikt bør inngå i alle relevante dok. Prosessindikator, nivå 1 Klimasårbarhetsanalyse	4.5	3.75	4.25	3.75	4	4.75	Several municipalities commented that 2090 is too distant, and it was suggested to split up the indicator into several ones with shorter time horizons. There was also apparent lack of knowledge of what a climate change vulnerability analysis entails.	P5	Has the municipality made a vulnerability analysis for climate change for:		have changed the order of P5 and P4 to make more sense, added short/medium/long to make it less tied to specific dates	Process 2	P11	Has the municipality made a vulnerability analysis for climate change for:
																																					a) 2030					a) short term (0-10 years)
																																					b) 2050					b) medium term (10-30 years)
																																					c) 2100					c) Long term (>30 years)
																																					d) Beyond 2100					d) How long term?
Process 1	P5	Have overall goals and strategies been drawn up for the climate adaptation work? If yes; which planning documents?			5		5	5	5	5		5	5	5	5	5	The indicator can give a relevant indication of the municipality's bottom line climate adaptation work. In Trondheim municipality, the strategies are found in a separate thematic plan for climate adaptation, but these can also be found/established in other plans, such as environmental and energy plans.	New wording: Are there concrete targets for climate adaptation in: a) KPS b) KPA.	P1	Are there concrete targets for climate adaptation in the municipal plan?	3	5	5	5	5		5	Veldig lik P5 (konkretiskert hvilket dok). Vurdert egnet. Kyrre: Viktig at CCA-mål er nedfelt i kom.planen (samf.del og/eller arealdel), gitt at indikatoren omfattar både KPS og KPA meiner eg key indicator = 5. kommuneplanens samfunnsdel. Utvid til arealdelen	3.5	3.5	2.5	4	4	5	Several municipalities commented on the phrase ‘concrete targets’, particularly in the context of the municipal plan. They questioned whether quantified goals should or can be part of the municipal plan, or whether they are more at home in more specific documents such as the climate plans or building regulations.	P6	Are there concrete targets for climate adaptation in the municipal plan?	Some municipalities have clear goals; others lack specificity.	concrete = SMART	Process 1	P6	Are there concrete targets for climate adaptation in the municipal plan?
																				a) Community section									4	4	4.66667	4.33333	4.66667	4.33333			a) Community section					a) Community section
																				b) Area section									4	4	4.66667	4	4.33333	4.33333			b) Area section					b) Area section
Process 1	P6	Have action plans been drawn up to achieve the goals of climate adaptation?			5		5	5	5	5	Krever at man skaffer seg oversikt over planer	5	5	3	5	5	Studying data for this indicator over time can provide useful feedback and knowledge of incorporation of and focus on climate adaptation in the various units in the municipality. The aim is that it should be easy to get an overview of where there are shortcomings in the municipal climate adaptation work, as well as which ones strategies/goals that have been adopted/applicable at all times. The da…	We have changed some of the wording, in discussion with the working group (SINTEF and Trondheim municipality) to make the indicator more concrete.																		P7	Have action plans been drawn up to achieve the goals of climate adaptation?	There is a need for an indicator on political anchoring, in addition to including residents. Example: Trondheim’s climate adaptation thematic plan was approved this year, with 66 proposed measures. Various municipal units are responsible for follow-up. Reporting on these measures is done in the municipality’s annual report, summarizing whether the measure is implemented, initiated, or not initiat…		Process 1	P7	Have action plans been drawn up to achieve the goals of climate adaptation?
Process 1	P7	Has the municipality created routines for following up the work on climate adaptation?										5	5	5	5	5	The indicator is largely linked the indicators "Has an overall goal been drawn up andstrategies for the climate adaptation work?" and "Have action plans been drawn up to achieve the goals withclimate adaptation?", but is intended to be able to provide supplementary information on the implementation and follow-up of measuresmentioned in plan. The indicator gives a good overview of how far you have…	For process indicator, level 1, we have chosen tochange the wording to: Has the municipality created a system or routines forreporting on the work on climate adaptation?										Viktig tema, men spørsmålet er formulert for vidt. Evt. "er CCA-strategi følgt opp med tiltak i sektorvise planar --> i så fall, kor mange?" som bokstav b til indikator 1 her? Gjelder kun planer og strategier								P10	Has the municipality created a system or routines for reporting on the work on climate adaptation?	Some municipalities report annually; others lack systems.		Process 1	P8	Has the municipality created a system or routines for reporting on the work on climate adaptation?
Process 1	P8	Has the municipality created routines for regular evaluation of the climate adaptation work, for example when revising the plan for climate and energy and climate adaptation?										-	-	-	-	-	Here, the starting point is the original indicator P7-P9 (Has the municipality created routines forfollow-up of the work on climate adaptation? Has the municipality created routines for regular evaluation ofthe climate adaptation work? Is there regular evaluation of the climate adaptation work?). Relevant data to map evaluation, follow-up and routines for the climate adaptation work is, for examp…	We have chosen to continue to include this indicator, to cover all the steps in the MRE wheel.																		P11	Has the municipality created routines for regular evaluation of the climate adaptation work, for example when revising the plan for climate and energy and climate adaptation?	Often missing; needs institutionalization.		Process 1	P9	Has the municipality created routines for regular evaluation of the climate adaptation work, for example when revising the plan for climate and energy and climate adaptation?
Process 1	P9	Is there regular evaluation of the climate adaptation work, for example when revising the plan for climate and energy and climate adaptation?																	P10	Is there regular evaluation of the climate adaptation work, for example when revising the plan for climate and energy and climate adaptation?				5	5	5	5	Jevnlig evaluering (P9) Vurdert egnet. Kan likevel i stedet legge det til i anvisningen, om når hver indikator bør vurderes. Fire år kan være lenge for noen? Kyrre: Tilhengar av at rullering inngår i indikatoren. Relevant, lett å overvake. Gjelder klimatilpasning generelt	3.75	3.5	4.25	3.5	3.75	4.75	This is an important indicator. It was suggested that it would be useful to link it to the risk analysis and annual reporting.
Process 2	P10	What proportion of the zoning plans adopted last year have provisions and/or guidelines on climate adaptation?			1		5	1	5	1	På sikt. Se lang forklaring av PBA6 i 2.0-indikatorsettet	1	5	1	5	1	Whether this indicator is relevant depends on whether the municipality has developed provisions for climate adaptation in zoning plans ("Has the municipality developed provisions on and/or guidelines for climate adaptation for use in work with zoning plans?"). The experience from Trondheim municipality is that there are very few zoning plans or associated documents with provisions/guidelines on c…	Based on the comment from the municipality we have deleted this indicator.										-
Process 2	P11	Based on the climate vulnerability analysis, what proportion of the climate adaptation challenges have measures been prepared for?			2		3	3		3	replace with "What proportion of the climate adaptation challenges identified in the ROS analysis has a measure card (tiltakskort) been prepared for? (Et tiltakskort er en huskeliste, som brukes til kvalitetssikring for de ulike oppgaver og ansvar i forbindelse med krise og beredskap.)"	2	3	3	-	3	The wording indicates that the municipality has carried out a climate vulnerability analysis. This is not necessarily the case, as other municipalities may only have it as an included part of the overall ROS. It is recommended that municipalities without their own climate vulnerability analysis start work on this. If own climate vulnerability analysis has not been carried out, one can start from …	You have data on implemented security measures financed by NVE, which you can start with.The municipalities also have an overview of funds they have applied for, both for investigation and physical measures (NVE) and knowledge acquisition (Environment Directorate), and funds they have received from NVE and the Environment Directorate. It does not give a complete overview of implemented measures, …	P6	Proportion of the climate adaptation challenges identified in the ROS analysis that specific measures have been prepared for	5	3	5	5	5			tracks municipalities' progress on addressing identified climate risks. More concrete than alternative indicators of this type. Høyrer ikkje denne indikatoren til gruppe "ROS"? Har kommunene rutiner på dette? Kan omformuleres til andel farer det er utarbeidet tiltaksplaner for	4	3.25	4	3	3.75	4.5	This may be difficult to answer. Climate risk and preventive measures can have significant differences in severity and cost, so an overall number may not be informative.
Process 2	P12	What proportion of master plans, theme plans and sector plans in the municipality have mentioned climate adaptation in relation to the number of plans that should deal with climate adaptation?		5	5	5	3	3	5	5	Bør deles per plantype. Tidkrevende							This indicator has been assessed as difficult to value and the relevance is also questionable, see comments from the municipalitites above. We have therefor deleted the indicator. Below follow several suggestions that have come up in the testing and discusion with the municipalities.
Process 2	P13	What proportion of decided investment projects (for example cost > x million NOK decided in the municipal council) in the past year have assessed the consequences of future climate change?		5	3	3		1			Summerstudent: Egne data, kan være vanskelig å tallfeste. Mtp gjennomførbarhet over tid, vurderes ikke denne som relevant for kommunen. Dette begrunnes med at man må gå gjennom alle politiske saker manuelt.	-	-	1	-	-	Based on the data collection process for Trondheim municipality, this seems difficult to value, and in terms of efficiency, the estimated time spent is so high that it is considered not feasible for the municipality. This is justified by the fact that all political matters must be reviewed manually.	This has been proposed to be retained by Trondheim municipality as something they can strive for, on the road towards implementation of benefit/cost analyses. We will therefore keep it for now.																		P17	What proportion of decided investment projects (for example cost > x million NOK decided in the municipal council) in the past year have assessed the consequences of future climate change?	This data generally is not collected, but it can be a good indicator in that it shows whether the municipality/politicians have considered climate change in their investments – it is important that climate adaptation is anchored among politicians.	added back in based on discussion with TRD (preferred this to cost-benefit analysis)	Process 2	P18	What proportion of decided investment projects (for example cost > x million NOK decided in the municipal council) in the past year have assessed the consequences of future climate change?
Process 2	P14	What proportion of the climate adaptation measures above x kroner has a cost/benefit assessment been prepared for?		5	3	5		3			Vurdert av TK. Relativt enkelt å telle opp	-	-	-	-	3	Based on experience from Trondheim municipality, there is a focus on balancing cost and useful measures for various climate challenges rather than for specific measures. Share of climate adaptation measures thus becomes a formulation that does not capture actual cost-benefit assessments in the municipality. It is also proposed to define/set requirements for what such a cost-benefit assessment mea…	We have retained the proposed wording. As of today, benefit/cost assessments are rarely carried out in the municipalities, but Trondheim municipality aims to do more of this type of analysis, and will retain it. In one benefit/cost assessment, all cost elements must be included in the calculation, including indirect costs and non‐priced effects. However, we still think this indicator will be diff…
Process 2	P15	What proportion/number of person-years is set aside for coordinating climate adaptation work?			3		5	5	5	5	Vurdert egnet av TK	3	5	5	5	5	The indicator seems relevant for mapping the bottom line in the municipality's development, and it is numerical data that is easy to compare and look at the development over time. However, it does not capture man-years associated with climate adaptation in general, for example cross-sectoral groups that do not have a job description for the coordination of climate adaptation or climate adaptation…	We have chosen to add "formal", which means that it must be included in the job description. New wording: "How many man-years have been formally set aside for coordinating climate adaptation work?"	P9	What proportion/number of person-years is set aside for coordinating climate adaptation work?		3		5	5	5	5	propose to include this as well - measure of human resources available	3.33333	2.66667	4.33333	3	3	4.66667	This is a useful indicator for applying political pressure. At least one municipality has assigned a full-time position for specific climate risks, but it was also raised that it can be difficult for small municipalities to find resources for this.	P18	What proportion/number of person-years is set aside for coordinating climate adaptation work?		Coordinating addition of 'formally' to concretise what counts as being set aside - officially part of job description	Process 2	P19	How many person-years are formally set aside for coordinating climate adaptation work?
																																				P12	Do you have a person responsible for coordinating the climate change adaptation work in the municipality?	There is a noticeable need for such a resource. Knowledge is scattered across the organization, making it difficult to gather. Most municipalities lack this; funding needed.		Process 1	P10	Do you have a person responsible for coordinating the climate change adaptation work in the municipality?
																			P12	Have strategies and measures been developed to involve the municipality's residents in the climate adaptation work?		5		5	5	5	5	Viktig tema, men fare for at denne kan bli tolka for "velvillig". Kan vi skjerpe vilkåra for å få godkjent på denne indikatoren? Innbyggerinvolvering. Prosessindikator 1.0? Kommunikasjon, åpne dok	4.5	4.25	4.5	4.5	4	4.25	Several municipalities took issue with the word ‘strategies’ as this has a specific meaning in the political context. It was suggested to change this to ‘methods’ to clarify that it is not necessary to develop an official strategy document to fulfil this indicator. Overall, the municipalities were unsure how to engage citizens, and are not sure how to measure their engagement level. Suggestions i…	P8	Have methods been developed to involve the municipality's residents in the climate adaptation work?			Process 1	P5	To what extent are the municipality's residents involved in your climate change adaptation work?
																																				P9	Have measures been implemented to involve the municipality's residents in the climate adaptation work?	This refers to involvement beyond fulfilling the Planning and Building Act (PBL). Voss has good experience with citizen involvement through the development of “Vossaklima 2030.” They have reached out to youth through school visits, hosted expert lunches at the town hall, climate cafés, and public meetings, and contacted volunteer organizations. The knowledge base has been presented to the Norwegi…
Process 2	P16	Has the municipality established an interdisciplinary/sectoral group, if any, routines for interdisciplinary cooperation for climate adaptation?									Se KFS_F3 (Indikator 2.0)	4	5	5	3	5	This indicator maps cooperation across the municipality, which is desirable as climate adaptation should be included in all municipal activities. The proposal is partly based on P16 ("Has the municipality established interdisciplinary/sectoral group possibly routines for interdisciplinary cooperation for climate adaptation?") in the original indicator set, but is intended to provide more informat…		P13	Has the municipality established an interdisciplinary/sectoral group or routines for interdisciplinary cooperation for climate adaptation?				5				(bør forenkle indikatorteksten)	4.5	4.25	4.25	4.5	4.5	4.25	There is experience with such cross-sectoral collaboration, for example in large construction projects and the development of regulation plans.
Process 2	P17	To what extent does the municipality use an internal interdisciplinary/sectoral group to discuss climate adaptation?									Se KFS_F3 (Indikator 2.0)	4	5	5	3	5	Same comment as above	Same comment as above	P14	When it comes to climate change adaptation, to what extent is there cooperation:				5			5	Tre indikatorer + en om nettverk? Sier ikke noe om hvor godt samarbeidet er… samarbeid innad, mellom kommuner, statsforv, næring, befolkning, internasjonalt							Reactions to this indicator varied, with some suggesting additional options such as the county, and other preferring a shorter list of maximum three options.	P19	When it comes to climate change adaptation, to what extent is there cooperation:	Subjective assessment. There is a strong need for cross-sectoral work, but it is a challenge to anchor it in the departments. Capacity limits involvement of private actors and residents. The indicators highlight where more effort is needed.	never/sometimes/often is still vague but better than low/med/high. Actual frequency will still vary depending on size of municipality for example	Process 2	P20	When it comes to climate change adaptation, to what extent is there cooperation:
																				a) Within the municipality									4	4.25	4.25	4	4.25	4.5			a) Within the municipality					a) Within the municipality
																				b) Between municipalities									4	4	4	4	4.25	4.5			b) Between municipalities					b) Between municipalities
																				c) between the municipality and the state administrator									4	4	4	3.75	4	4.25			c) between the municipality and the state administrator					c) between the municipality and the state administrator
																				d) between municipalities and public actors									4	3.5	4	3.5	3.5	4.5			d) between the municipality and the county					d) between the municipality and the county
																				e) between the municipality and private actors									4	3.75	4	3.75	4.25	4.5			e) between the municipality and private actors					e) between the municipality and private actors
																				f) between the municipality and citizens									4	3.5	4	3.5	3.5	4.5			f) between municipalities and public actors					f) between municipalities and public actors
																																					g) between the municipality and citizens					g) between the municipality and citizens
																																					h) Internationally					h) Internationally
																																					i) With research					i) With research
																																					j) In national climate change adaptation networks					j) In national climate change adaptation networks
																																				P13	What proportion of zoning plans since year 0 are within risk areas for climate-related damage?	Clarify whether this refers to zones of consideration, caution zones, or hazard zones. Describe the methodology in the guidance to ensure consistency. GIS expertise required.		Process 2	P12	What proportion of zoning plans since year 0 are within risk areas for climate-related damage?
																																					a) Area regulation					a) Area regulation
																																					b) Detailed regulation					b) Detailed regulation
Output	T1	Proportion of revised zoning plans that have included climate adaptation measures in relation to the total number of revised zoning plans	Behov for spesifisering - Avklaring av tid - Hva er en revidert reguleringsplan? Kan ha en indikator for alle gjeldende reguleringsplaner, ikke kun reviderte Burde relateres relevante risikoer (ikke havnivåstigning for et hyttefelt på fjellet) Kan være utfordrende å følge opp				5	5	1	2	Vurdert av TK. For få planer. Foreslått tatt ut	1	5	5	1	2	Based on experience from Trondheim municipality, this indicator is proposed to be excluded from the data set. Trondheim had two revised plans for 2021, and neither of them has included climate adaptation measures. Corresponding ROS analyzes for the areas had not been revised either, so this suggests that climate risk has not been reassessed. When the data base is so small for a large municipality…	Same comment as above	P7	Proportion of zoning plans that are within risk areas for climate-related natural hazards that have documented risk management in the form of determination/consideration zone		5		5	3	5	5	Krever en del arbeid med gjennomgang av planer og GIS-analyse. Veldig relevant indikator. Reguleringsplan	4.5	4	3.25	4	3.75	4	This is a requirement in TEK17, but many existing zoning plans date from before. It may be more informative and efficient to limit the review to new plans.	P14	Proportion of zoning plans that are within risk areas for climate-related natural hazards since year 0 that have documented risk management in the form of determination/consideration zone	Clarify whether this refers to zones of consideration, caution zones, or hazard zones. Describe the methodology in the guidance to ensure consistency.	Year 0 (suggestion is 2020 but municipality can set their own Y0 depending on how far back they want to go). Reporting per year enables identification of trends. Optionally break down in different types of plans, which can be determined by the municipality	Process 2	P13	Proportion of zoning plans that are within risk areas for climate-related natural hazards since year 0 that have documented risk management in the form of determination/consideration zone
																																					a) Area regulation					a) Area regulation
																																					b) Detailed regulation					b) Detailed regulation
Output	T2	Proportion of climate adaptation measures carried out in accordance with plan								5	Assumes that a climate change adaptation plan exists. If yes, then a relevant indicator.							See earlier comment on measures and plans	T2	Proportion of climate adaptation measures carried out according to plan							5	this is a nice generalised output indicator. Can add note that this should be split out to specific measures if possible, but this gives at least an overall sense of progress. Might be hard to define 'according to plan'; how do you deal with delays for example?	4	4	4.33333	4.25	4	4.5	There was strong support for splitting this indicator into two or three steps: the measures, the plans and the implementation. In addition, it is important to keep track of the effect of the implementation. It was noted that this can be difficult to get and keep an overview of, and budget needs to be set aside for this. Some municipalities are planning to implement a new system which combines ana…					Output	T4	Number of implemented measures
Output	T3	Proportion of maintenance plans for buildings where climate adaptation is mentioned	Vedlikehold er klimatilpasning i seg selv Vanskelig å skille mellom vedlikehold knyttet til klimaendringer (vs. eksisterende klima) Digitalisering hjelper Klimaendringer burde nevnes spesifikt ifm investeringer og ROS		1		3	1		3	Kan bli en indikator dersom det inngår i rutine for tilstandsrapportering							Not assessed	P11	To what extent is climate change considered in maintenance plans of:									5	5	5	5	5	5	There may be other plans that could be added here, for example for critical infrastructure or cultural monuments. In the context of parks and green spaces it was raised that these can both have an adaptive function (for example slowing runoff) but can also themselves be vulnerable to climate hazards (for example flooding).					Process 2	P17	Is climate change considered in maintenance plans of:
																				a) municipal buildings									4.25	4	4.5	3.5	4	4.5								a) municipal buildings
																				b) municipal infrastructure									4.5	4.25	4.75	3.75	4.25	4.5								b) municipal infrastructure
																				c) municipal parks and other green spaces									4.5	4.25	4.75	3.75	4.25	4.5								c) municipal parks and other green spaces
																																										d) critical infrastructure
																																										e) cultural heritage sites
																																				P20	What proportion of climate change adaptation indicators has a measurement routine been developed for?			Process 2	P21	What proportion of climate change adaptation indicators has a measurement routine been developed for?
																																				P21	When did you last evaluate your climate change adaptation work?			Process 2	P22	When did you last evaluate your climate change adaptation work?
																																								Risk	R1	Proportion of area in caution zone for:
																																										a) surface water
																																										b) flooding
																																										c) landslide and rockfall
																																										d) quick clay
																																										e) storm surge
																																										f) sea level rise
																																										g) wind
																			R1	Proportion of area that has been mapped for risk:				5				for each risk (a,b, c…), (on 'Share of potential danger areas that have had real danger mapping': sea level rise, landslide, river flooding. How is aktsomhet defined vs risk? Lilo: possible alternative to 'Proportion of area mapped for risk'. Might be more useful to exclude non-danger zones (though real issue with classifying areas as non-danger zone when climate change isn't taken into account i…							The term ‘area that has been mapped for risk’ should be clearly explained. There was some discussion on what else could or should be included in risk mapping, including caution areas (aktsomhetsområder) and past events (e.g. landslide alerts). The list of risks that have been mapped for can be adjusted per municipality; for example, wind is also very relevant for some regions. There are currently…	R1	Proportion of area that has been mapped for risk:	Needs national standardization; complex to assess locally.		Risk	R2	Proportion of caution zone area mapped for risk:
																				a) surface water									4.25	3.25	4	3.5	3.5	4.5			a) surface water					a) surface water
																				b)flooding									4.5	3.5	4	4.25	4.25	4.5			b) flooding					b) flooding
																				c) landslide and rockfall									4.5	3.5	3.75	3.5	3.75	3.75			c) landslide and rockfall					c) landslide and rockfall
																				d)quick clay									4.75	3.75	4.25	4.25	4.25	4.25			d) quick clay					d) quick clay
																				e) storm surge									4.75	3.75	4.25	3.75	3.75	4.25			e) storm surge					e) storm surge
																				f) sea level rise									4.75	3.25	3.75	3.75	3.75	3.75			f) sea level rise					f) sea level rise
																																					g) wind					g) wind
																			R2	Proportion of mapped area identified as risk area:				5				I think these are good indicators							There should be clarification of what is meant by ‘mapped area identified as risk area’. One municipality questioned to what extent current risks reflect how important that type of avalanche will be in the future. For example, avalanches may become less frequent, while landslides are expected to increase. The risk maps do not indicate which type of landslide (‘skred’) risk should dictate urban pl…	R2	Proportion of mapped area identified as risk area:	Often overlap with R1; need better data and definitions.		Risk	R3	Proportion of mapped area identified as risk area:
																				a) surface water									4.5	4.25	3.25	3.5	3.5	4.25			a) surface water					a) surface water
																				b) flooding									4.5	4.25	3.25	4.25	4.25	4.25			b) flooding					b) flooding
																				c) landslide and rockfall									4.5	4.25	2.75	3.5	3.75	3.5			c) landslide and rockfall					c) landslide and rockfall
																				d) quick clay									4.5	4.25	3.25	4.25	4.25	4			d) quick clay					d) quick clay
																				e) storm surge									4.5	4.25	3.25	3.75	3.75	4			e) storm surge					e) storm surge
																				f) sea level rise									4.5	3.75	2.75	4	3.75	3.5			f) sea level rise					f) sea level rise
																																					g) wind					g) wind
																			R3	Proportion of buildings located in total mapped area:				5				Instrumentell indikator med tanke på å motivere til god risikokartlegging. relevant for infrastrucutre (roads)?							It was raised that this is not equally well mapped for all risk types. Generally speaking the risk indicators were seen as relevant, although wind (damage) should be added. In addition, even if an area is mapped for risk this is not always included in plans. There is a lack of overview on this matter.	R3	Proportion of buildings located in total mapped area:	Often overlap with R1; need better data and definitions.		Risk	R4	Proportion of buildings located in caution area:
																				a) surface water									4.75	4.5	3.5	3.25	4.25	4.5			a) surface water					a) surface water
																				b) flooding									4.75	4.5	3.5	4	4.25	4.5			b) flooding					b) flooding
																				c) landslide and rockfall									4.75	4.25	3	3	4.25	3.75			c) landslide and rockfall					c) landslide and rockfall
																				d) quick clay									4.75	4.5	3.5	4	4.25	4.5			d) quick clay					d) quick clay
																				e) storm surge									4.75	4.75	3.5	4	4.25	4.75			e) storm surge					e) storm surge
																				f) sea level rise									4.75	4.75	3	3.5	4.25	4.25			f) sea level rise					f) sea level rise
																																					g) wind					g) wind
Outcome	O11	Proportion of buildings for health and care services located in risk areas for	Bygg som er registrert i matrikkelen er også kategorisert i sikkerhetsklasser Bør ha indikatorer for andre kritiske funksjoner (brann, skole og barnehage)	5	3	3	5	3	5	4	Consider removing "sea level rise" from the indicator title. The focus is buildings exposed to risk, not SLR per se (which is hardly measurable over a 4 year period). Few health/care services buildings per municipality, rather choose next indicator. evaluated by summer student. More relevant for risk assessment, not necessarily CCA, and m2 doesn't directly correspond to actual m2 affected; doesn'…							Not assessed	O4	Proportion of buildings located in risk areas:	5	3	3	5	3	5	5	(on indicators 'Proportion of households/m2 buildings within the municipality's geographical boundaries that are not located in areas that are exposed to a climate risk or are secured against such risk.': Highly relevant, but potentially time consuming to establish. Changed the vurdering from MENON (5); don't think it's sensitive enough. See above…m2 seems strange in this case. Could this be two …							Bruke Kunnskapsbanken Faresone eller mogleg fare (aktsemdkart?) Som flaum? (TEK17 § 7-2) Etterspørre nasjonalt kartlag klasseifisert etter TEK17 § 7-2 (F1-, F2- og F3-tiltak)? - Eit F1 tiltak i flaumsonen 1/200 ligg "trygt nok" i følgje krava i TEK17 Som skred (TEK17 § 7-3) - kanskje aktuelt med kartlag med bygg klassifisert etter K0-K4? Etterspørre nasjonalt kartlag klasseifisert etter TEK17 § 7…	R4	Proportion of buildings located in risk areas:			Risk	R5	Proportion of buildings located in risk area:
		a) stormwater																		a) surface water									4.75	4.5	3.5	3.25	4.25	4.75			a) surface water					a) surface water
		b) river flood																		b) flooding									4.75	4.5	3.5	4.25	4.5	4.75			b) flooding					b) flooding
		c) landslide																		c) landslide and rockfall									4.75	4.5	3	2.75	4.25	4			c) landslide and rockfall					c) landslide and rockfall
		d) quick clay																		d) quick clay									4.75	4.5	3.5	4.25	4.25	4.5			d) quick clay					d) quick clay
		e) sea level rise																		e) storm surge									4.75	4.5	3.5	4	4.25	4.75			e) storm surge					e) storm surge
																				f) sea level rise									4.75	4.5	3	3.5	4.25	4.25			f) sea level rise					f) sea level rise
																																					g) wind					g) wind
Outcome	O12	Proportion of inhabitants living in risk areas for	Krever et relativt stort arbeid med datainnhenting Kan være mer hensiktsmessig å basere indikatoren på bygningstype Bør kunne skille på hvilke faresoner som lå til grunn da byggesaken ble innvilget (dato for løyve)	5	3	5	3	3	4	4	A somewhat less detailed (opposite) version of #250, which should be preferred. comment summerstudent: Vanskelig å kvantifisere/tallfeste innbyggerantall og følgelig innbyggerandel, da innbyggerstatistikk på laveste geografiske nivå som er tilgjengelig er på grunnkretsnivå. Kan brukes til å visualisere hvor hvilke høyt befolkede områder som overlapper med risikoområder, men tallfesting blir feila…	1	1	3	5	5	The indicator is difficult to quantify/number. Population statistics and consequently population share of the total population, has the lowest available spatial resolution at basic district level.The risk areas for the various climate-related events are often smaller than the basic circuit level, so figures for potentially vulnerable residents are thus wrong. The indicator can optionally be used …	The benefit/cost analysis model of NVE (NKA) calculates a probability of how manypeople who are in the risk area, but as of now this is very approximate. For delete the indicator for now.
		a) stormwater
		b) river flood
		c) landslide
		d) quick clay
		e) sea level rise
Outcome	O13	Proportion of square meters of buildings located in risk areas for	Det er enklere å hente inn data for type bygg	5	3	3	5	3	5	5	See above. evaluated by summer student. More relevant for risk assessment, not necessarily CCA, and m2 doesn't directly correspond to actual m2 affected; doesn't take into account different floors incl. cellars	3	5	3	5	5	Without z‐value (height data) for building data (besides digital terrain model (DTM)) one will not assess the proportion of square meters in exposed areas without introducing errors, such as basements and floor height naturally varies. Instead, you can find the proportion of square meters (floor space for buildings) within the risk areas, as well as the number of buildings. It seems like a favora…	We delete this indicaotor. Information is provided through the new risk-indicators.
		a) stormwater
		b) river flood
		c) landslide
		d) quick clay
		e) sea level rise
Outcome	O14	Proportion of roads that are in risk areas for	Dersom det ikke finnes faresonekart fra NVE, krever det en større kartleggingsjobb Omkjøringsmuligheter bør inkluderes	5	1	3	5	3	5	3		1	5	3	5	3	The indicator does not seem to measure actual climate vulnerability, as it does not say anything about how risk is handled/reduced within the risk areas, or how this changes over time. The indicator says also nothing about, for example, water depth for roads during extreme events (storm surge, flood andwater accumulation). As of today, the indicator is therefore assessed as limited in terms of re…	In the long term, risk modeling can be linked to the EFFEKT model of the Norwegian Public Roads Administration, which provides more information about exposed road sections (and detour possibilities and costs). Water depth must be visible incorporated. Publicly available data already differentiates by type of road. It will be a useful indicator in the long term, especially linked to other critical…
		a) stormwater
		b) river flood
		c) landslide
		d) quick clay
		e) sea level rise
Output	T4	Proportion of health and care buildings where security measures have been taken against the risk of damage as a result of	Det bør tydeliggjøres at det kun skal tas hensyn til oppdatert klimarisiko. Det burde være tilsvarende indikatorer for andre kritiske funksjoner, som brannvesen, skoler og barnehager. Sikringstiltak må registreres og merkes av i kart. NVE Atlas registrerer sikringstiltak for flom og skred. Differensiere hva som var gjeldende byggeregler ved	4	3	2	4	3		4	Can we have a general indicator on measures? They could be so different and have different efficiency… Maybe easier with an indicator on % of buildings in flood-prone areas? Difficult as it is phrased at the moment, since the effect of measrues can vary, als different measuer, etc. relevant, but data is probably not available/takes a lot of effort to collect	3	5	3	5	5	The indicator quantifies potentially exposed health and care services, but can also visualized with spatial resolution to be able to develop and assess where and what should be implemented risk-reducing/mitigating measures. In Trondheim municipality, a map analysis was planned, where share exposed buildings were also presented visually, so that the data could be used further in a climate vulnerab…	Here, it is intended to distinguish critical infrastructure/societal functions in risk assessment. This is relevant in the long term, but requires GIS competence in the municipality. The indicator can be replaced with something like"m2/number of buildings that are not in a risk area or protected against risk". This one is more interpretable (higher value is better adaptation level), more sensitiv…	T1	Proportion of buildings in risk areas where security measures have been implemented against the risk of damage:	5	4	3	3	3		4	NVE har kart over gjennomførte tiltak (flom og skred). Vedlikehold vet jeg ikke om dokumenteres. https://kartkatalog.nve.no/#kart Edvard: Link these to the new ones above?							One municipality raised the issue of ‘residual risk’. Was the risk zone mapped before and/or after security measures were implemented? If a survey has not been carried out after the security measures have been put in place, it may be uncertain whether the building is secured well enough according to the requirements in TEK17 For example, in Gartveit, Øystese, buildings are secured with a security…	T1	Proportion of buildings in risk areas where security measures have been implemented against the risk of damage:	Many mitigation measures are not mapped. Hazard zones after a measure describe residual risk. Difficult to set a target value for the indicator		Output	T1	Proportion of buildings in risk areas where security measures have been implemented against the risk of damage:
		a) stormwater																		a) surface water									4.5	4.5	3.75	3	3.75	4.75			a) surface water					a) surface water
		b) river flood																		b) flooding									4.5	4.5	3.75	4	3.75	4.75			b) flooding					b) flooding
		c) landslide																		c) landslide and rockfall									4.5	4.5	3.75	3	3.75	4.25			c) landslide and rockfall					c) landslide and rockfall
		d) quick clay																		d) quick clay									4.5	4.5	3.75	4	3.75	4.75			d) quick clay					d) quick clay
		e) sea level rise																		e) storm surge									4.5	4.5	3.75	4	3.75	4.75			e) storm surge					e) storm surge
Output	T5	Proportion of residents who live in areas where security measures have been taken against the risk of damage as a result of	Det finnes tilgjengelige data på dette	2	1	3	1	3	3	2	Hard to interpret: High score might be good (risk prevention has been prioritized) AND bad (large proportion of population rezides in risk prone areas). Sensitivity: Change can be due to moving of residents instead of risk measures taken. Maybe easier with an indicator on % of people living in flood-prone areas?									f) sea level rise									4.5	4.5	3.25	3.33333	3.75	4.25			f) sea level rise					f) sea level rise
		a) stormwater																																			g) wind					g) wind
		b) river flood
		c) landslide
		d) quick clay
		e) sea level rise
Output	T6	Proportion of square meters of buildings in areas where security measures have been implemented against the risk of damage as a result of		5	4	3	3	3		4	Addresses risk mitigation, not land-use planning. relevant, but data is probably not available/takes a lot of effort to collect. Can we have a general indicator on measures? They could be so different and have different efficiency…
		a) stormwater
		b) river flood
		c) landslide
		d) quick clay
		e) sea level rise
Output	T7	Proportion of roads in areas where security measures have been implemented against the risk of damage as a result of	Faresonekartene er ikke detaljerte og dekker store områder Hva menes med andel (andel av hva - strekning eller antall?) Bør finnes en indikator som måler hvor effektive sikringstiltakene er Gradering av tiltak Burde være en indikator på strekninger med behov for sikringstiltak	3	4	3	5	3	1	4	The indicator makes less sense without knowledge on the proportion of roads that are in risk areas (#255). reporting on security measures gives a more sensitive indicator. Dpesn't say anything about importance of the road though (how much is actual accessibility impacted if this road closes?) and lacks link with actual risk (and thus how much the risk is reduced). maybe change to 'roads not in ri…
		a) stormwater
		b) river flood
		c) landslide
		d) quick clay
		e) sea level rise
Output	T8	Share of bridges that have been upgraded to cope with e.g. 200-year floods with climate impact	Det finnes tilgjengelige data	5	5	5	3	3	5	5								Not assessed by municipalitiy, but deleted due to data availability.
Output	T9	Proportion of gutters that are dimensioned with a climate surcharge	Noen kommuner har gjort en slik kartlegging Materialtype er relevant (ikke bare dimensjoner)	5	5	5	3	3	5	5								Not assessed by municipalitiy, but deleted due to data availability.
Output	T10	Proportion of stormwater measures that are solved using measures within local stormwater management instead of traditional pipe-based solutions	Det finnes ikke nødvendigvis tilgjengelige data på dette Det løses per byggesak, og det er ikke alltid det blir søkt om å koble seg på Krever deling av data (bl.a fra fylkeskommunen) Kan være stor variasjon mtp lokasjon (sentrum vs utenfor sentrum) Man må gå inn i planer og plandokumenter for å finne lokale overvannstiltak (åpning av bekker, holde bekker åpne, type dekke, etc.)	5	1	5	5	1	5	5	Could be hard to differ between traditional and LOD solutions in cases where hybrid solutions apply.	4	5	1	3	5	In the current paradigm for climate adaptation, open and local solutions are desirable stormwater management in favor of traditional network-based solutions that divert the water away. Local premises, however, limits generalizability and validity, as not all municipalities can reduce the extent of damage and the likelihood of unwanted consequences and damage from open, local stormwater solutions.…	Alternative proposals are not necessarily better, and we prefer original proposals that are more generic and general. The comment that it will be difficult to find data can be partially resolved through the proposal to report/register some of the necessary underlying data, e.g. the proceedings so that you do not have to go through all the plans manually every year. This also has the potential to …
Output	T11	Share of the municipality's drinking water sources for which contingency plans have been drawn up, considering changes in vulnerability and quality as a result of climate change	Beredskapsplanen utarbeides ikke per vannkilde Det eksisterer både kommunale og private drikkevannskilder Mattilsynet sjekker de private drikkevannskildene Kommunene bør ha oversikt over de kommunale drikkevannskildene Bør omformuleres - Kan bytte ut beredskapsplan med ROS - Kan bytte ut drikkevannskilder med vannverk eller vannforsyning	5	3	5		5			For snevert dersom vi skal ha berre éin indikator på planlegging.							Not assessed	P8	Is there a contingency plan for:	5	3	5	5	5			Beredskapsplan flom %? Make generic to all physical risks? Beredskapsplan per sårbarhet (Menon har drikkevann og skogvann, mens Klostermann foreslår flom) Beredskapsplan a) flom, b) drikkevann, c) skogbrann, ..							This indicator should be adjusted to reflect local climate hazards. There was again discussion about the age of the plans, as well as to what extent the execution of these plans is tested or practiced for. This is generally governed by the statsforvalteren, but can also be done by the municipality itself.	P15	Is there a contingency plan for:	Varies by hazard; some lack plans for drought or quick clay.	Edvard: burde vi her presisert at det er snakk om beredskapsplan for hvis en klimarelatert hendelse skulle inntre?	Process 2	P14	Is there a contingency plan for:
																				a) drinking water									4.75	4.75	4.75	4.75	4.75	4.5			a) drinking water					a) drinking water
																				b) forest fire									4.75	4.75	4.75	4.75	4.75	4.5			b) forest fire					b) forest fire
																				c) flooding									4.75	4.75	4.75	4.75	4.75	4.5			c) flooding					c) flooding
																				d) drought									4.75	4.75	4.75	4.75	4.75	4.5			d) drought					d) drought
																				e) quick clay									4.75	4.75	4.75	4.75	4.75	4.5			e) quick clay					e) quick clay
																				f) other types of landslide and rockfall									4.66667	4.75	4.75	4.75	4.75	4.5			f) other types of landslide and rockfall					f) other types of landslide and rockfall
																																				P16	When were the contingency plans last updated?		Similar to new P2b, to highlight the importance to keeping plans up to date with new data and emerging climate risks	Process 2	P15	When were the contingency plans last updated?
																																										a) drinking water
																																										b) forest fire
																																										c) flooding
																																										d) drought
																																										e) quick clay
																																										f) other types of landslide and rockfall
																																								Process 2	P16	Does the municipality require an environmental program with regard to climate change adaptation for major developments?
																			T4	Fraction of permeable surfaces in built area (including green roofs)								I think this will be inaaccurate on municipal level	2.66667	3.5	3.33333	2.75	2.66667	4	There is a need for clear definitions of ‘built area’ and ‘permeable’ – what is permeable enough to qualify? A suggestion was made to create a national system or routines for GIS analyses to calculate this. Some municipalities expressed doubt over the relevance for more rural areas without dense urban areas.
																			T5	Investment support from NVE for landslide and flood protection								Støtte fra NVE til klimatilpasningstiltak. Make generic to all climate risks? Underspørsmål med risikotyper	4.33333	3.75	3.66667	4.25	3.66667	4	Although this was seen as an important indicator, several issues were raised. First, how far back in time should one go? Secondly, it should be taken into consideration that this is in large part dictated by NVE’s budget and the length of the waiting list to get support. The indicator should be split into need for support, requested support and granted support.	T2	Support from NVE for assessment and measures	Can be difficult to define support on an annual basis.		Output	T2	Support from NVE for assessment and measures
																																					a) Assessment support applied for					a) Assessment support applied for
																																					b) Physical measures support applied for					b) Physical measures support applied for
																																					c) Assessment support received					c) Assessment support received
																																					d) Physical measures support received					d) Physical measures support received
Outcome	O1	Number of household hours per year in the municipality without electricity as a result of climate-related natural events	Hva menes med husholdningstimer? Er hytter inkludert? Kan det som skyldes klimarelaterte hendelser skilles ut?	5	1	5	5	5	5	5	limited to household impact, ignores e.g. public and commercial spaces. Good data availability and is tracked already to highly effective, but low reliability; doesn't distinguish between impact of increase in extreme events and increase in adaptation efforts							Not assessed
Outcome	O2	Number of household hours per year in the municipality without water as a result of a climate-related natural event	Vannverk forsyner også andre abonnenter, som industri, helse og omsorg, så kanskje abonnenttimer eller forsyningstimer er bedre Må skille på årsak til at vannet blir skrudd av (kvalitet eller brudd) Bør være en indikator for vannkvalitet i tillegg	5	1	5	5	5	5	5	limited to household impact, ignores e.g. public and commercial spaces. Good data availability and is tracked already to highly effective, but low reliability; doesn't distinguish between impact of increase in extreme events and increase in adaptation efforts	1	5	5	5	1	The indicator cannot be directly related to climate adaptation or climate vulnerability and assessedas not suitable for mapping. Should therefore be excluded from the indicator set. Preferably with an indicator attached for preparedness for climate-related natural events.	We currently have an indicator of emergency plans, so we delete this one.
Outcome	O3	Number of household hours per year in the municipality that are without a supply road as a result of a climate-related natural event	Bør skilles på om det er omkjøringsmuligheter Bør skilles på type vei (kommunal vei, fylkesvei og riksvei	5	1	5	5	5	5	5	limited to household impact, ignores e.g. public and commercial spaces. Good data availability and is tracked already to highly effective, but low reliability; doesn't distinguish between impact of increase in extreme events and increase in adaptation efforts							Not assessed
Outcome	O4	Number of alerts (flood, landslide, storm, storm surge)	Er dette egentlig en resultatindikator? Varsling i forkant av en hendelse – presiser (fra hvem til hvem) Bør også ha en indikator på hvor mange hendelser som inntreffer, per naturhendelse	5	4	3	4	1	2	3	Number of flood alerst itself doesn't have to do with assessing climate change adaptation. Sensitivity: Decrease/unchanged numbers of alerts may be a result of mitigation measures, but hard to establish causality.should be per time unit. Question of how sensitive this is adaptation efforts							Not assessed										-
Outcome	O5	Number of efforts from fire and rescue services in climate-related natural events																Not assessed
																			O10	Annual payouts/number of cases through:																O10	Annual payouts/number of cases through:	Relevant indicators when it comes to damages after major extreme weather events. However, miscategorizations reduce validity.	Relevant med både tal utbetalingar og kronebeløp for å fange opp om det er store enkeltutbetalingar?	Outcome	O9	Annual payouts/number of cases through:
Outcome	O6	Annual payments/number of cases through the natural disaster insurance scheme (Norwegian natural damage pool - NASK) (homes, holiday homes and commercial buildings)			2		5	5	5	5	Finans Norge har statistikk per fylke. Kommunalbanken har	2	5	5	5	5	Natural damage data and water damage data at municipal level seem like a relevant indicator when it concerns damage after major extreme weather events (higher recurrence interval than 20 years), which is expected to get increased intensity/frequency during ongoing climate change. Based on a previous assessment of water damage data, however, the categorization is sometimes poor and misleading, wit…	Damage insurance data at address level from the Knowledge Bank is currently insufficient, but aggregated damage data from natural damage statistics and water damage statistics at municipal level can be used as an indicator, waiting for better analyzes of damage data.		a) Natural disaster insurance scheme (Norwegian natural damage pool - NASK) (homes, holiday homes and commercial buildings)		2		5	5	5	5	Make more general by including other funding sources? Annual payments (number or sum) from the Natural Damage Fund (or insurance companies) for damage to buildings. Annual payments/number of cases through discretionary grants triggered by climate-related natural events Annual payments/number of cases through extraordinary discretionary grants triggered by climate-related natural events Annual pay…	5	4	4	4	4	4.5			a) Natural disaster insurance scheme (Norwegian natural damage pool - NASK) (homes, holiday homes and commercial buildings)					a) Natural disaster insurance scheme (Norwegian natural damage pool - NASK) (homes, holiday homes and commercial buildings)
Outcome	O7	Annual payments/number of cases through the natural disaster compensation scheme (Directorate of Agriculture) (private infrastructure)				1					Landbruksdirektoratet publiserer aggregert statistikk for hele landet. Kunnskapsbanken har per sak (tror jeg)									b) Natural disaster compensation scheme (Directorate of Agriculture) (private infrastructure)									4.66667	3.5	3.33333	3.66667	3.66667	4			b) Natural disaster compensation scheme (Directorate of Agriculture) (private infrastructure)					b) Natural disaster compensation scheme (Directorate of Agriculture) (private infrastructure)
																				c) Vannskadeforsikring (vanninntrenging utenfra over og under grunn)																	c) Vannskadeforsikring (vanninntrenging utenfra over og under grunn)					c) Vannskadeforsikring (vanninntrenging utenfra over og under grunn)
																				d) The Norwegian Environment Agency's support scheme for climate change adaptation (capacity building)									4.66667	3.75	3.66667	4	4	4.25
Outcome	O8	Annual payments/number of cases through discretionary grants triggered by climate-related natural events									Man søker om skjønnsmidler, og det bør kunne merkes									e) Discretionary grants for climate change adaptation									4.75	3.66667	3.66667	4	4	4
Outcome	O9	Annual payments/number of cases through extraordinary discretionary grants triggered by climate-related natural events				1					Ekstraordinære skjønnsmidler er øremerket for et formål og bør kunne spores. Mulig det er få tilfeller, og det registreres ikke systematisk									f) Extraordinary discretionary grants triggered by climate-related natural events									4.75	3.66667	3.66667	4	4	4			d) Extraordinary discretionary grants triggered by climate-related natural events					d) Extraordinary discretionary grants triggered by climate-related natural events
																																				T3	Other support schemes:	Useful but may cover broader topics than adaptation.	Er dette ein eigna indikator? Seier sjølvsagt noko om aktiviteten på klimatilpassingsfeltet, men mange forhold utanom kommunen sin kontroll som bestemmer om det blir tildelt støtte og kor stort støttebeløpet blir.	Output	T3	Other support schemes for climate change adaptation
																																					a) The Norwegian Environment Agency's support scheme for climate change adaptation (capacity building)					a) The Norwegian Environment Agency's support scheme for climate change adaptation (capacity building)
																																					b) Discretionary grants for climate change adaptation					b) Discretionary grants for climate change adaptation
																																					c) Environmental grants (Ministry of Agriculture)					c) Environmental grants (Ministry of Agriculture)
																																										d) Grants for ditching/drainage of agricultural land (Ministry of Agriculture)
Outcome	O10	Number of new recourse claims against the municipality (in natural damage cases)			5		5	5	5	5	Regresskrav om at det ikke burde vært gitt byggtillatelse etter en hendelse. Tilgjengelig info. Jeg mener det er en pekepin på hvordan planarbeidet gjennomføres	3	5	3	5	3	Claims for compensation are only valid for events with a predicted recurrence interval of less than 50 years,usually also under 20 years (e.g. intensive rainfall event). The drainage network is not dimensioned for extreme weather events, where own fire (in case of natural damage) or property insurance (in case of flood damage) applies to any payment of compensation. For extreme rainfall events, r…	In the original indicator set, this indicator was intended as the number of recourse cases against the municipality in natural damage cases, where the insurance company believes that municipalities should not have been granted building permission. It says something if the municipality allows construction in exposed areas, but at the same time there are few cases and we chose to take this indicato…
Outcome	O15	Proportion of roads that have to close in the event of 200-year floods with climate surcharge		5	5	4	3	2	5	5	Data avaiability							Not assessed										-
Outcome	O16	Share of municipal combined sewage pipes (Length of combined sewer pipelines for both sewage and stormwater (km) / Total length of sewage pipeline (km))			2		5	5	5	3	Relevance for RFF unclear	5	5	5	5	5	Combined sewage system is problematic under observed and expected effects of climate change. More precipitation (precipitation events in general and extreme weather events in particular) gives a big extraneous water input into the waste water network, which has consequences such as polluting emissions, water damage, capacity issues of treatment plants and costs. It is therefore advantageous to re…	This is an indicator on which there is readily available data for the municipalities. It is a useful indicator, which is, however, time‐ and cost‐consuming to influence.	O1	Share of municipal combined sewage pipes (Length of combined sewer pipelines for both sewage and stormwater (km) / Total length of sewage pipeline (km))		2		5	5	5	3	Separate sewage/stormwater systems are more climate adapted, so this fraction should decrease over time https://www.fhi.no/nettpub/hin/skader/skader-og-ulykker-i-norge/ Kyrre: I suggest this output indicator as municipalities should be encouraged to separat sewage and stormwater pipes, and because the data are available.	5	4.66667	2.5	5	5	5	The data for this is simple and easily accessible via KOSTRA. However, it would also be useful to look at dimensioning and the applied climate surcharge. Does KOSTRA also report data on this?	O5	Share of municipal combined sewage pipes (Length of combined sewer pipelines for both sewage and stormwater (km) / Total length of sewage pipeline (km))	Useful for tracking infrastructure upgrades. Relevant but difficult to track; data inconsistencies noted.		Outcome	O6	Share of municipal combined sewage pipes (Length of combined sewer pipelines for both sewage and stormwater (km) / Total length of sewage pipeline (km))
Outcome	O17	Number of rainwater overflows per km of combined network (Number of rainwater overflows (number) / Length of combined pipe (km))		5	5	3	5	5	5	4	Better than the previous since it is related to pipe lenghts	2	5	5	5	3	Combined sewage overflows occur as a result of bursting capacity on the combined network, where water must be released into a stream, river or fjord so as not to flood cellars. The indicator is considered moderately valid to measure climate adaptation as rainwater overflows also occur during normal rainfall events in today climate, for example due to outdated communal network. Nor is the number o…	The data is avaiable, so we have kept av version of this indicator.	O2	How often does the combined sewer overflow?	4	4	4	5	5	5	4	Typically the municipalities measure time the CSO are in operation (so the unit could be "total hours/year") Kyrre: I suggest this as one of two outcome indicators. Combined sewer overflow is easy to measure, the indicator puts the spotlight on a widespread vulnerability and on the need to separate drains.	4.5	4.25	3.66667	4	4	4.5	The suggested unit for this indicator is hours/year. Would the number of overspills be better?	O6	How often does the combined sewer overflow?	Volume is a better indicator in terms of validity, but data availability for that is a challenge	Edvard: bedre med % enn antall, eventuelt kan antall timer bli brukt	Outcome	O7	How often does the combined sewer overflow?
																			O5	Overløpsdrift fra nettet % av pe tilknyttet ledningsnettet								Overløpsdrift fra nettet % av pe tilknyttet ledningsnettet (altrerativ til overløpsdrift i timer)	5	4.5	4	4.5	4.33333	4.5
																			O3	Proportion of residents connected to wastewater treatment plants where treatment requirements are met									4.5	4.25	3.66667	4.25	4	4.5		O7	Proportion of residents connected to wastewater treatment plants where treatment requirements are met	Difficult to get correct numbers without manually counting all subscribers. Some have septic tanks with overflow to a municipal pipe that goes to the sea and is therefore registered as sewage instead of sludge.	Edvard: antagelig ikke presis nok ift. klimaendringer, foreslår å ta bort denne
																			O6	E-coli: Proportion of residents connected to municipal water works with satisfactory test results		5		5	5	5	5	-	5	4.5	3	4.5	4.33333	4.5		O8	E-coli: Proportion of residents connected to municipal water works with satisfactory test results		Edvard: mest sannsynlig ikke spesifikk nok mot klimaendringer, i tillegg vil responsen for klimaendringer være for treg. Foreslår å ta bort denne
Outcome	O18	Proportion of residents connected to municipal water works with satisfactory test results in relation to color numbers			3		5	5	5	5		3	5	5	5	5	It is expected that climate change will lead to changes in raw water quality, and will in many cases lead to an increased color number in the drinking water source(s). This seems to be a good indicator to measure raw water quality, together with E. coli samples. By assessing raw water quality over time, it will be possible to uncover the need for more extensive water treatment, for example, in th…	Climate change with increased temperature and extended growing season will produce more leaves and foliage as time goes on breaks down and partly ends up in our surface waters and gives an increased humus content. But the changes are expected to happen slowly and the color number will also be affected by other factors, so for now we delete this indicator.	O7	Colour: Proportion of residents connected to municipal water works with satisfactory test results								-	4.5	4.25	2.66667	4.25	4	4.5		O9	Colour: Proportion of residents connected to municipal water works with satisfactory test results		Edvard: mest sannsynlig ikke spesifikk nok mot klimaendringer, i tillegg vil responsen for klimaendringer være for treg. Foreslår å ta bort denne
Outcome	O19	Proportion of stream and river length in exposed areas / urban areas that is open	Bedre å be om andel som er lukket? I tillegg bør det være en indikator på antall kritiske punkt og bekkeinntak for å få frem der det kan skje tetting og skade på hus Alternative vannveier bør inkluderes Plandokumenter er relevant for tiltak, mens man i byggesaker finner søknader om tiltak (og tilsyn)	4	4	3	4	3	3	4		-	-	-	-	-	"Exposed areas" and "open" should be defined. The indicator requires a good deal of work, but seems relevant to assess exposed areas along waterways. As per August 2022, this was not carried out for Trondheim municipality.	It must be specified what is meant by "open"; does it mean "not in pipes", or without vegetation? For the moment we have deleted this indicator.										-
Outcome	O20	Proportion of stream and river length in exposed areas that have edge vegetation		4	3	5	4	3	3	4	Does this also include quality/categorisation of edge vegetation as in DAS?	-	-	-	-	-	The most important measure from agriculture to reduce water pollution is to comply with the requirement that there must be at least two meters of edge vegetation zone towards rivers and streams. The edge vegetation must be untouched, but up to 50% harvesting is permitted. The effect of the edge vegetation zones on run-off nutrients is great. Former Jordforsk, now part of NIBIO, has found that a f…	While the summer student comments point to important benefits for edge vegetation, edge vegetation not only useful in agricultural areas. It stabilizes the river bank and acts as a safeguard against erosion from rainfall. We agree that data acquisition can be quite time-consuming, and the indicator says nothing about the quality of the vegetation. The term "edge vegetation" should also be defined…	T3	Proportion of stream and river length in exposed areas that have edge vegetation	4	3	5	4	3	3	4	Krevande datainnsamling, men viktig og pedagogisk indikator viss den blir ajourført.	3.33333	3	3.66667	3	2.33333	4	There was some uncertainty about the definitions of ‘exposed area’ and ‘edge vegetation’ and the availability of data on this.
Outcome	O21	Proportion of building cases that use the blue-green factor measured against the total number of building cases	Denne kan bli relevant litt lenger frem i tid, når blågrønn faktor ev. blir et krav og det registreres		3		5	1		5	I guess the relevance depends on which blue/green factor they choose? Don't quite understand how the indicator is meant	3	5	1	-	5	BGF is a tool that ensures predictability for developers with regard to requirement for outdoor space when that applies to water management, vegetation and biodiversity in construction projects. The framework requirement is set to ensure minimum stormwater management and vegetation in accordance with current laws and guidelines Future cities (Cities of the Future, 2016).	We keep this indicator.	O8	Proportion of building projects that use the blue-green factor measured against the total number of building projects		3		5	1		5		4	4.66667	4.66667	4	4.33333	5	As with T2, the question was raised which plans this indicator covers. How can this be followed up on in practice? And how does the relevance of this indicator vary between urban and rural settings? A possible rephrasing could be ‘Proportion of construction projects that have used the blue-green factor as a basis’.	O10	Proportion of building projects that have used the blue-green factor as a basis	If no metadata on the blue-green factor is stored for building case plans or zoning plans when the BGF is established, this will require a manual review of all plans for one year, which would be very time-consuming		Outcome	O8	Proportion of building projects that have used the blue-green factor as a basis
Outcome	O22	Extraneous water in the drainage network		3	3	3	5	5	5	4		3	5	5	5	5	A challenge with the combined pipe network is the generation of extraneous water in the treatment plant; water that initially does not need treatment, which takes up both capacity and resources in treatment plants and drainage network. With climate adaptation and separation of the pipe network, a proportion of extraneous water is expected in the sewage network to be reduced over time. However, it…	We agree with the proposal, but it will require separate calculations and analyses. It is possible this will bemore relevant for the largest municipalities/further municipalities. Furthermore, relevance is probably lower than indicated here. If one were to divide the indicator according to the area and type of extrangeous water, the indicator would probably be less available and more complicated …	O4	Basement flooding where the municipality acknowledges responsibility								Kjelleroversvømmese totalt ant/1000 person tilknyttet (denne skiller ikke ut klimarelaterte hendelser, men kan kanskje breukesmed indikatoren "Kjelleroversvømmleser der kommunen anerkjenner ansvarer? Begge rapporteres i KOSTRA)	3.5	4	3.66667	4	3.33333	4.5	A relevant indicator, but the cause of the flooding should be clarified. Would it also be relevant to look at total cases of basement flooding and not just those where the municipality acknowledges responsibility? Some municipalities have a ban on basements.
																			O9	Heat stress in urban environments: number of hot days measured at urban weather stations compared to number of hot days measured nationally/at rural weather stations				4				could be relevant, but highly dependent on existence of weather stations. It's important that it's a comparison of URBAN hot days to some sort of average, so it can track progress in reducing UHI effect. Kyrre: I suggest this as one of two outcome indicators. UHI should be addressed, as vulnerability to urban heat probably will increase in the coming decades. Measures against UHI often have co-be…	4.33333	3.75	2.66667	3.5	3.75	2.75	There was little recognition among the municipalities that this is an issue currently, but it is expected to become more relevant and should be considered as a long-term indicator.
																																								Outcome	O10	Applications for plan dispensations in building applications
																																										a) Applications for new buildings in agricultural, nature and outdoor recreation/reindeer areas outside the 100-meter belt along saltwater
																																										b) Applications in agricultural, nature and outdoor recreation/reindeer areas with a building ban along freshwater in the municipal plan
																																										c) Applications for new buildings in the 100-meter belt along saltwater

## Sheet: Set V
Set V
	ID	Grouping	Indicator	Unit	Type	Data source	Description
Process part 1	P1	Goals and strategies	Are there concrete targets for climate adaptation in the municipal plan?	Y/N	Process	Own data	Formulating concrete targets is a crucial step in a municipality’s adaptation efforts. By anchoring these into all parts of the municipal plan, the value and importance of adaptation gains legitimacy.
			a) Community section
			b) Area section
	P2	Risk assessment	Has an overall ROS analysis (according to the Planning and Building Act) been prepared for the municipality as a whole?	Y/N	Process	Own data	It is important to have an up-to-date ROS to identify and understand the physical risks facing the municipality.
	P3	Risk assessment	How many of the focus areas of NOU 2010:10 ‘Adapting to a changing climate’ does the ROS analysis consider?	# or scale	Process	Own data	This indicator assesses the breadth of the ROS in terms of affected areas of interest.
			a) natural environment			NOU 2010:10 (NO)
			b) human health and safety			NOU 2010:10 (EN)
			c) infrastructure and buildings
			d) business and industry
			e) society
	P4	Risk assessment	To what extent are climate-related incidents part of the municipality's overall ROS?	Scale	Process	Own data	This indicator highlights the importance of including climate risk and vulnerability in the ROS.
	P5	Risk assessment	Has the municipality made a vulnerability analysis for climate change up to 2090 ?	Y/N	Process	Own data	This indicator addresses the need for considering the potential impacts of expected climate change, so that future risks can be reduced. The target year can be adjusted, for example to 2100, to accommodate for differences in scenario analyses done for the municipality.
	P6	Planning	Proportion of the climate adaptation challenges identified in the ROS analysis that specific measures have been prepared for	%	Process	Own data	Once the risks are identified, they must be addressed. This indicator tracks the progress in planning for adaptation.
	P7	Planning	Proportion of regulatory plans that are within risk areas for climate-related natural hazards that have documented risk management in the form of determination/consideration zone	%	Process	Own data	This indicator highlights the importance of incorporating climate change vulnerability in all planning stages.
	P8	Emergency preparedness	Is there a contingency plan (beredskapsplan) for:	Y/N	Process	Own data	In addition to reducing risk, it is paramount to be prepared for when an unavoidable disaster occurs.
			a) drinking water
			b) forest fire
			c) flooding
			d) drought
			e) quick clay
			f) other types of landslide and rockfall
	P9	Resources	What proportion/number of man-years is set aside for coordinating climate adaptation work?	% or #	Input		Climate change adaptation is a complex matter. This indicator reminds users that it is valuable to set aside time for coordinating the efforts.
	P10	Evaluation	Is there regular evaluation of the climate adaptation work, for example when revising the plan for climate and energy and climate adaptation?	Y/N	Process	Own data	Evaluation is an integral part of
Process part 2	P11	Maintenance	To what extent is climate change considered in maintenance plans of:	Scale	Process		Climate change may lead to increased maintenance needs.
			a) municipal buildings
			b) municipal infrastructure
			c) municipal parks and other green spaces
	P12	Citizen engagement	Have strategies and measures been developed to involve the municipality's residents in the climate adaptation work?	Y/N	Process	Own data	It has been shown that citizen involvement is important for successful and equitable development (Brink and Wamsler, 2018; Rivas et al., 2021).
	P13	Cross-sectoral collaboration	Has the municipality established an interdisciplinary/sectoral group or routines for interdisciplinary cooperation for climate adaptation?	Y/N	Process	Own data	This indicator highlights the importance of broad collaboration within the municipality.
	P14	Cross-sectoral collaboration	When it comes to climate change adaptation, to what extent is there cooperation:	Scale	Process	Own data	This indicator focuses on wider collaboration across governance levels, sectors and borders.
			a) Within the municipality
			b) Between municipalities
			c) between the municipality and the state administrator
			d) between municipalities and public actors
			e) between the municipality and private actors
			f) between the municipality and citizens
Risk	Rx1	Risk mapping	Proportion of area that has been mapped for risk:	%	Risk	Own data	This indicator tracks progress in the risk mapping process.
			a) surface water			NVE Aktsomhetskart Kystverket
			b) flooding
			c) landslide and rockfall
			d) quick clay
			e) storm surge
			f) sea level rise
	Rx2	Risk mapping	Proportion of mapped area identified as risk area:	%	Risk	NVE risikoområde kart	This indicator tracks progress in the risk mapping process.
			a) surface water
			b) flooding
			c) landslide and rockfall
			d) quick clay
			e) storm surge
			f) sea level rise
	Rx3	Risk mapping	Proportion of buildings located in total mapped area:	%	Risk	NVE risikoområde kart	This indicator tracks progress in the risk mapping process.
			a) surface water
			b) flooding
			c) landslide and rockfall
			d) quick clay
			e) storm surge
			f) sea level rise
	Rx4	Risk mapping	Proportion of buildings located in risk areas:	%	Risk	NVE risikoområde kart	This indicator tracks progress in the risk mapping process.
			a) surface water
			b) flooding
			c) landslide and rockfall
			d) quick clay
			e) storm surge
			f) sea level rise
	Rx5	Risk reduction	Proportion of buildings in risk areas where security measures have been implemented against the risk of damage:	%	Output	NVE sikringstiltak kart	Combining this indicator with R4 gives a more realistic indication of vulnerability and progress in adaptive capacity.
			a) surface water
			b) flooding
			c) landslide and rockfall
			d) quick clay
			e) storm surge
			f) sea level rise
Measure	T1	Measure	Proportion of climate adaptation measures carried out according to plan	%	Output	Own data
	T2	Measure	Proportion of stream and river length in exposed areas that have edge vegetation	%	Output	GIS, aerial photos
	T3	Measure	Fraction permeable surfaces in built area (including green roofs)	%	Output
	T4	Economic	Investment support from NVE for landslide and flood protection	NOK/yr	Input	NVE, own data
Result	R1	Water management	Share of municipal combined sewage pipes (Length of combined sewer pipelines for both sewage and stormwater (km) / Total length of sewage pipeline (km))	%	Output	KOSTRA
	R2	Water management	How often does the combined sewer overflow?	Hours/yr	Outcome	KOSTRA
	R3	Water management	Proportion of residents connected to facilities where cleaning requirements are met	%	Outcome	KOSTRA
	R4	Water management	Basement flooding where the municipality acknowledges responsibility	#	Outcome	KOSTRA
	R5	Water management	Overløpsdrift fra nettet % av pe tilknyttet ledningsnettet	%	Outcome	KOSTRA
	R6	Water provision	E-coli: Proportion of residents connected to municipal water works with satisfactory test results	%	Outcome	KOSTRA
	R7	Water provision	Colour: Proportion of residents connected to municipal water works with satisfactory test results	%	Outcome	KOSTRA
	R8	Blue-green factor	Proportion of building projects that use the blue-green factor measured against the total number of building projects	%	Output	Own data
	R9	Heat stress	Heat stress in urban environments: number of hot days measured at urban weather stations compared to number of hot days measured nationally/at rural weather stations	Days/yr	Outcome	Norsk Klimaservicesenter
	R10	Economic	Annual payouts/number of cases through:	# or NOK/yr	Outcome	a) NASK, Kunnskapsbanken
			a) Naturskadeforsikring Natural perils insurance scheme			b) Landbruksdirektoratet, Kunnskapsbanken
			b) Naturskadeerstatning Natural perils compensation scheme for private infrastructure			c) VASK (Finans Norge), Kunnskapsbanken
			c) Vannskadeforsikring (vanninntrenging utenfra over og under grunn) Insurance claims from water intruision damages			d) Miljødirektoratet
			d) Miljødirektoratets støtteordning for klimatilpasning (kompetanseheving) The Norwegian Environment Agency’s support scheme for climate changhe adaptatoin			e) Statsforvalteren, own data
			e) Skjønnstilskudd til klimatilpasning Discretionary funding for climate change adaptation			f) Statsforvalteren, Kommunal- and regionaldepartementet, and own data
			f) Ekstraordinære skjønnsmidler i forbindelse med en naturhendelse Extraordinary discretionary funding
			g) Legg til relevant og tilgjengelig støtteordning Add relevant support scheme (i.e. The Norwegian Agency for Local Governments’ loan for climate change adaptation)
